# Supplementary material
Source: PubMed Central journal article supplement (PMC4941231)
Supplement: NIHMS798342-supplement-Supplemental.pdf [file NIHMS798342-supplement-Supplemental.pdf]

**Supplementary material:**

**Table 1: Description of the genotyped SNPs in *LEP* gene**

| No. | SNP name    | Position  | Alleles | Expected MAF* | Location | Observed MAF | p-value for HWE |
|-----|-------------|-----------|---------|---------------|----------|--------------|-----------------|
| 1   | rs4731426   | 127476021 | C/G     | 0.392         | Intron 1 | 0.339        | 0.1451          |
| 2   | rs117635178 | 127484013 | T/C     | 0.425         | Intron 1 | 0.441        | 1               |
| 3   | rs11760956  | 127485038 | G/A     | 0.283         | Intron 1 | 0.253        | 0.2595          |
| 4   | rs2071045   | 127486931 | T/C     | 0.237         | Intron 2 | 0.248        | 0.9019          |
| 5   | rs3828942   | 127488256 | A/G     | 0.492         | Intron 2 | 0.403        | 0.7036          |

Abbreviations: SNP - single nucleotide polymorphism, MAF – minor allele frequency, HWE – Hardy-Weinberg Equilibrium

\*The expected MAF is based on data from the International HapMap Project for population of European ancestry.

**Table 2: Association between *LEP* genotype and plasma leptin change ( $\Delta$ leptin) in months 0-6\***

| SNP         | Genotype | N   | $\Delta$ leptin 0-6mo | $\beta^1$ | p-value <sup>1</sup> | FDR    |
|-------------|----------|-----|-----------------------|-----------|----------------------|--------|
| rs4731426   | CC       | 87  | -2.45                 | -0.84     | 0.0766               | 0.1174 |
|             | CG       | 116 | -3.51                 |           |                      |        |
|             | GG       | 59  | -4.17                 |           |                      |        |
| rs117635178 | TT       | 78  | -1.99                 | -0.78     | 0.1373               | 0.1373 |
|             | CT       | 131 | -3.43                 |           |                      |        |
|             | CC       | 53  | -4.81                 |           |                      |        |
| rs11760956  | GG       | 139 | -2.60                 | -1.04     | <b>0.0437</b>        | 0.1174 |
|             | AG       | 99  | -3.95                 |           |                      |        |
|             | AA       | 24  | -4.95                 |           |                      |        |

|           |    |     |       |      |        |        |
|-----------|----|-----|-------|------|--------|--------|
| rs2071045 | TT | 144 | -3.19 | 0.16 | 0.0939 | 0.1174 |
|           | TC | 100 | -3.58 |      |        |        |
|           | CC | 18  | -2.51 |      |        |        |
| rs3828942 | GG | 79  | -4.62 | 0.86 | 0.0784 | 0.1174 |
|           | AG | 127 | -3.12 |      |        |        |
|           | AA | 56  | -1.76 |      |        |        |

\* adjusted for age, sex, diet group and changes in weight, leptin, adiponectin and HDL-c concentrations between 0-6 months

<sup>1</sup>  $\beta$  values are of the additive model, p-values of ANCOVA
